# Supplementary material for: Concurrent Inhibition of Akt and ERK Using TIC-10 Can Overcome Venetoclax Resistance in Mantle Cell Lymphoma
Source: MDPI journal article supplement (doi:10.3390/cancers15020510), 2023-01-13
Supplement: s1 [file s1]

## Supplementary Materials for

Concurrent inhibition of Akt and ERK using TIC-10 can overcome venetoclax resistance in mantle cell lymphoma

**This PDF file includes:**

Figures. S1 to S2

Tables S1 to S5

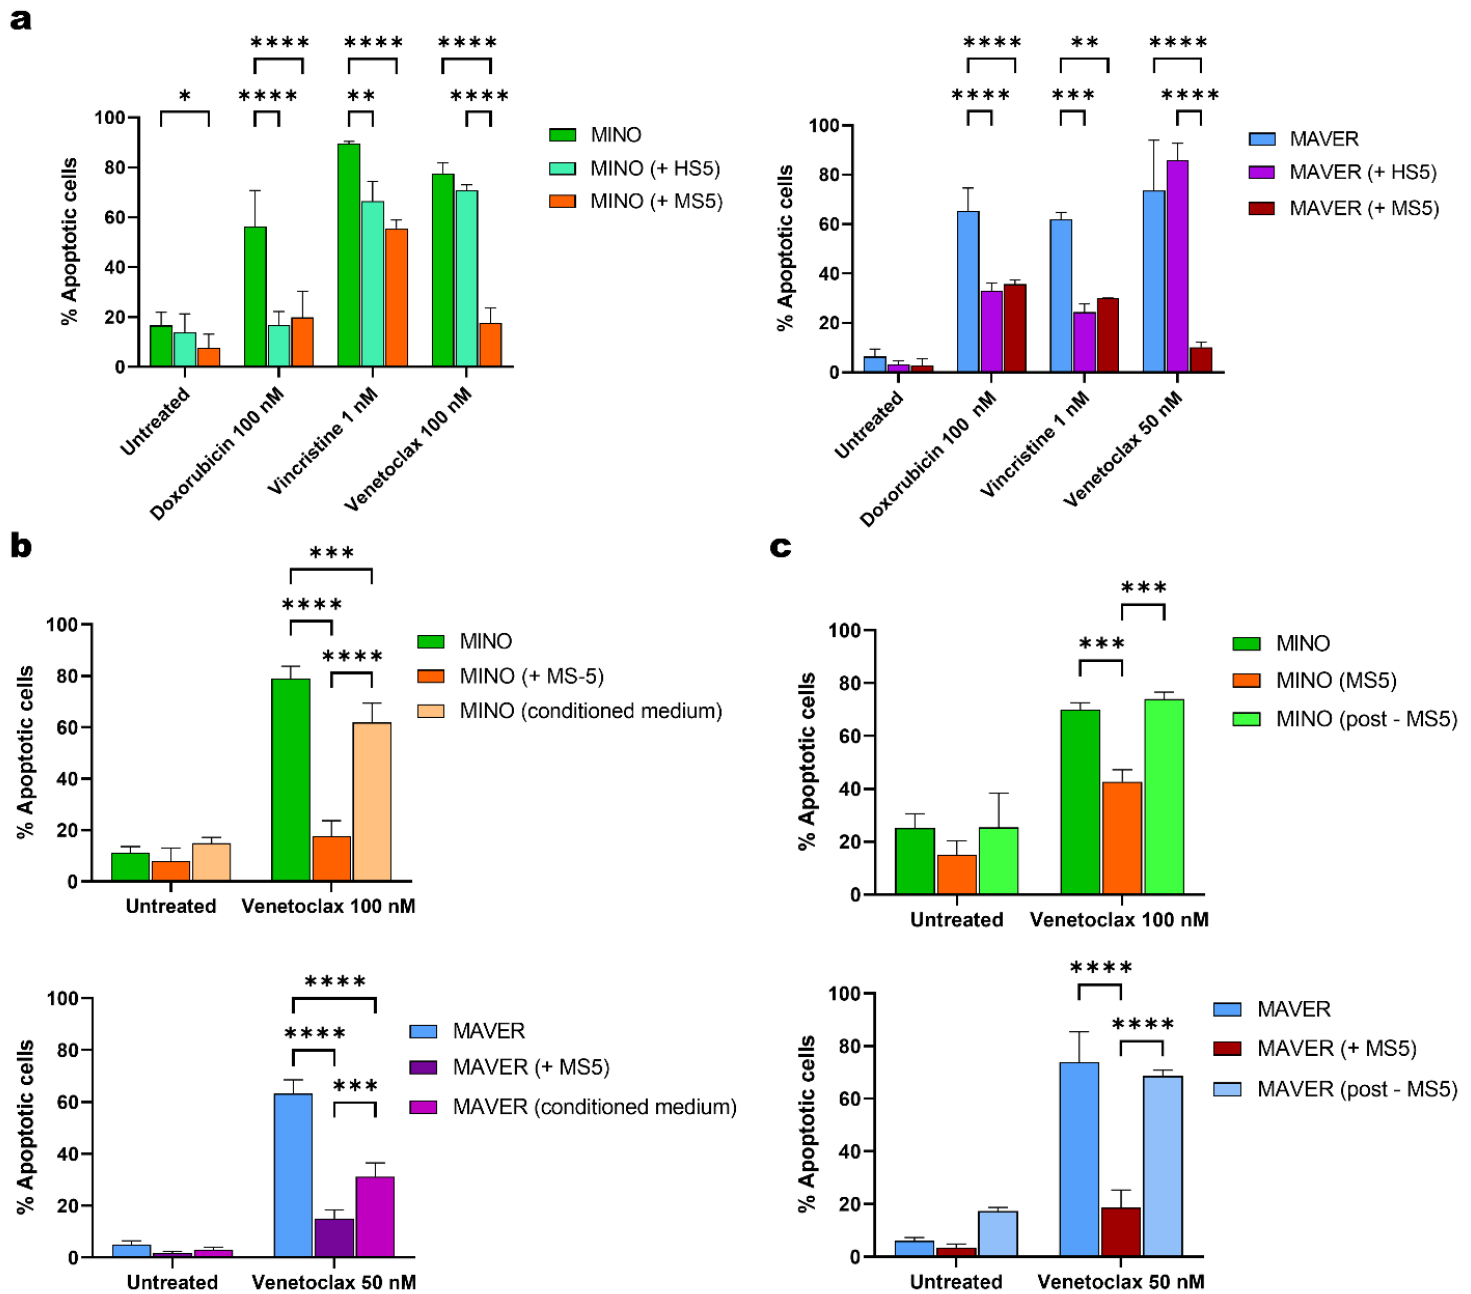

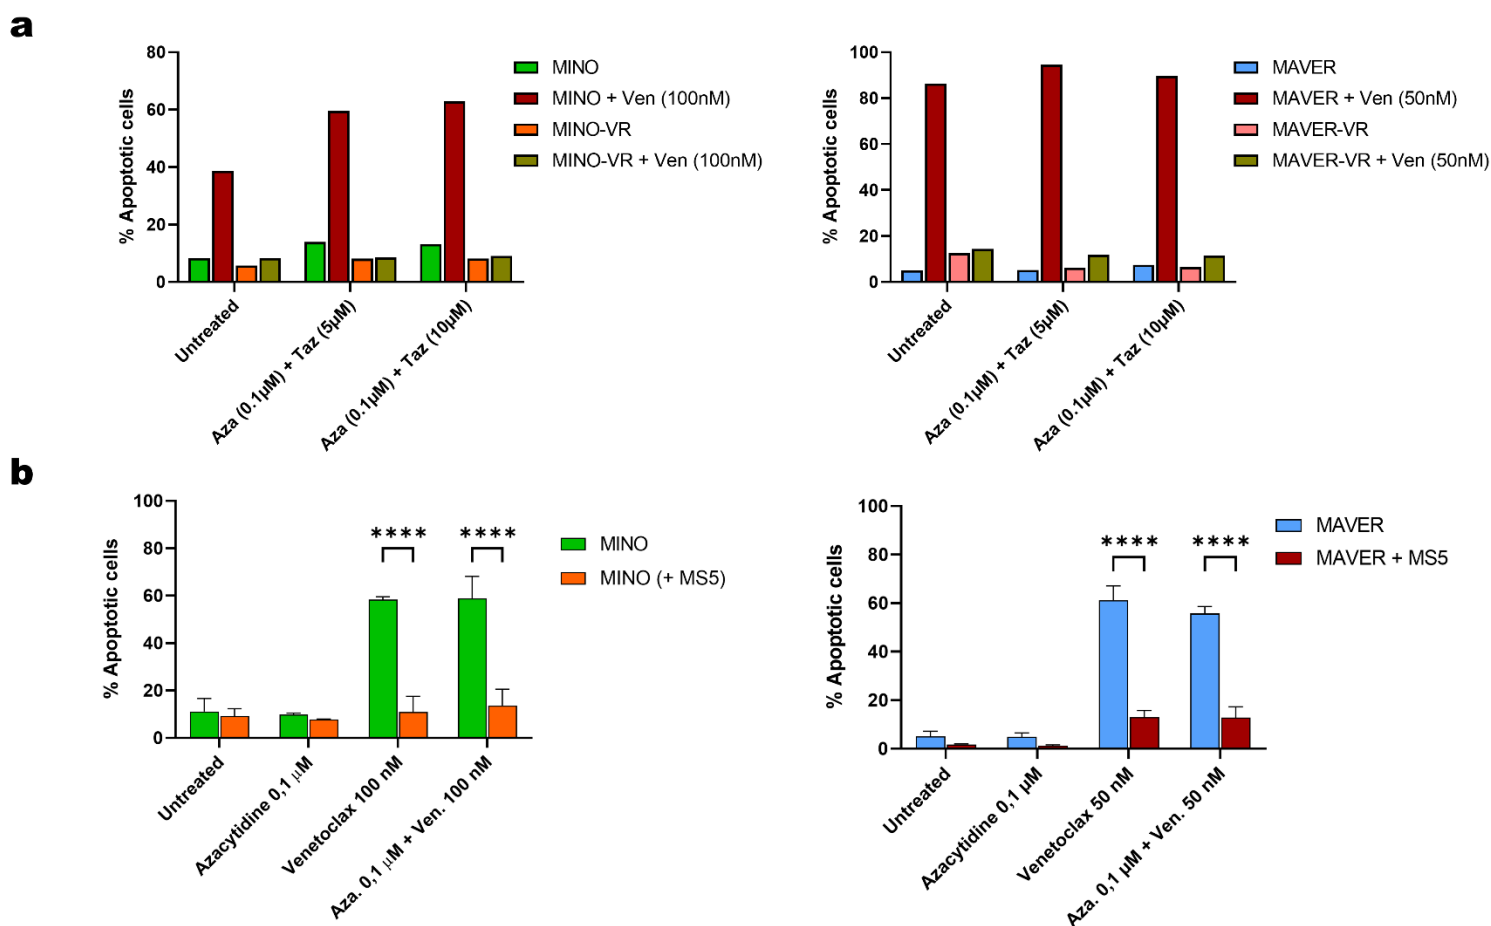

**Figure S2.** A) Bar charts with the apoptotic response of MINO/MINO-VR (left) and MAVER/MAVER-VR (right) after being treated with the epigenetic drugs 5-azacytidine (Aza) and Tazemetostat (Taz) in two different combination doses for 48 hours, followed by treatment with either nothing or venetoclax. Data are shown as mean + SD (n =3). B) Bar charts of the measured apoptotic response of MINO (left) and MAVER (right) in co-culture with MS-5 treated with Azacytidine prior to the treatment with venetoclax. Data are shown as mean + SD (n = 3).

**Table S1.**

Primer sequences of all primers used in the study.

| <b>Gene</b>                   | <b>Forward primer</b>              | <b>Reverse primer</b>           |
|-------------------------------|------------------------------------|---------------------------------|
| <i>SF3A1</i>                  | 5'- TCCATCCGTGAGAAGCAGAGC - 3'     | 5'- TCTGGATCTCCTCCTCACCG - 3'   |
| <i>PUM1</i>                   | 5'- CATGCCAGGTTATCCGGTGT - 3'      | 5'- GCGCCTGCATTCACTACAAG - 3'   |
| <i>BCL2</i>                   | 5'- ACGACTTCTCCCGCCGCTAC- 3'       | 5'- CACCACCGTGGCAAAGCGT- 3'     |
| <i>MCL1</i>                   | 5'- CAAAGAGGCTGGGATGGGTT- 3'       | 5'- GCAACACCTGCAAAAGCCAG- 3'    |
| <i>BCL-XL</i>                 | 5'- GCAGGTATTGGTGAGTCGGA- 3'       | 5'- CCACAAAAGTATCCCAGCCG- 3'    |
| <i>BIM</i>                    | 5'- GGCCCCTACCTCCCTACA- 3'         | 5'- GGGGTTTGTGTTGATTTGTCA- 3'   |
| <i>NOXA</i>                   | 5'- GAGTGTGCTACTCAACTCAG- 3'       | 5'- CCTTGGAACGGAAGATGGA- 3'     |
| <i>PUMA</i>                   | 5'- GACGACCTCAACGCACAGTA- 3'       | 5'- CTAATTGGGCTCCATCTCG- 3'     |
| <i>ACTB</i><br>(AcceSss/ble)  | 5'- AGAGGGGGTAAAAAATGTTGTAT - 3'   | 5'- TCGAACCATAAAAAACAACCTTC -3' |
| <i>GRP78</i><br>(AcceSss/ble) | 5'- AGATAGTTGTTGAATTAATGGGATT - 3' | 5'- CCCCCCAACTAATTCATTAATA -3'  |

**Table S2**Calculated IC<sub>50</sub> values for the MCL-1 inhibitor S63845 and the BCL-XL inhibitor WEHI-539 in the parental and venetoclax-resistant (VR) MINO and MAVER cells.

| <b>Cell line</b> | <b>S63845 IC<sub>50</sub> (μM)</b> | <b>WEHI-539 IC<sub>50</sub> (μM)</b> |
|------------------|------------------------------------|--------------------------------------|
| MINO             | 0.13                               | 0.11                                 |
| MINO-VR          | 0.89                               | 104.8                                |
| MAVER            | 4.31                               | 294.1                                |
| MAVER-VR         | 0.96                               | 104.2                                |

**Table S3.**

Overview of the 21 common mutations between venetoclax resistant MINO-VR and MAVER-VR, when comparing their genetic profile to the paternal MINO and MAVER, and after subtraction of the genetic aberrations acquired during prolonged culture (MINO-LT and MAVER-LT cell lines).

| Location               | Allele   | Consequence             | SYMBOL  | Gene            | cDNA_position |
|------------------------|----------|-------------------------|---------|-----------------|---------------|
| 4:73139975-73139975    | A        | stop_gained             | ANKRD17 | ENSG00000132466 | 2771          |
| 15:49931287-49931287   | A        | stop_gained             | ATP8B4  | ENSG00000104043 | 1627          |
| 8:112314512-112314512  | T        | stop_gained             | CSMD3   | ENSG00000164796 | 7551          |
| 11:108513912-108513912 | T        | stop_gained             | EXPH5   | ENSG00000110723 | 1827          |
| 16:31397595-31397595   | A        | splice_acceptor_variant | ITGAD   | ENSG00000156886 | -             |
| 3:66500405-66500405    | A        | start_lost              | LRIG1   | ENSG00000144749 | 618           |
| X:71136596-71136596    | T        | stop_gained             | MED12   | ENSG00000184634 | 5500          |
| 10:128104037-128104037 | T        | frameshift_variant      | MKI67   | ENSG00000148773 | 8216-8217     |
| 11:102791332-102791332 | G        | splice_donor_variant    | MMP1    | ENSG00000196611 | -             |
| 11:118262936-118262936 | A        | stop_gained             | MPZL2   | ENSG00000149573 | 364           |
| 5:36953698-36953698    | A        | start_lost              | NIPBL   | ENSG00000164190 | 491           |
| 7:83155605-83155605    | A        | frameshift_variant      | PCLO    | ENSG00000186472 | 1327-1328     |
| 10:3082387-3082387     | C        | splice_acceptor_variant | PFKP    | ENSG00000067057 | -             |
| 16:88733746-88733746   | TGTGATGG | splice_acceptor_variant | PIEZO1  | ENSG00000103335 | -             |
| 8:56167337-56167337    | A        | stop_gained             | PLAG1   | ENSG00000181690 | 883           |
| 22:26292873-26292873   | T        | stop_gained             | SEZ6L   | ENSG00000100095 | 770           |
| 6:169248782-169248782  | A        | stop_gained             | THBS2   | ENSG00000186340 | 389           |
| 17:7676195-7676196     | -        | frameshift_variant      | TP53    | ENSG00000141510 | 315           |
| 9:137200363-137200363  | A        | stop_gained             | TPRN    | ENSG00000176058 | 379           |
| 5:124744570-124744598  | -        | frameshift_variant      | ZNF608  | ENSG00000168916 | 1020-1047     |
| 19:36819933-36819933   | T        | stop_gained             | ZNF790  | ENSG00000197863 | 535           |

**Table S4.**

Overview of the chromatin accessibility ( $\Delta$ Acc.) and DNA methylation ( $\Delta$ Meth.) changes between the venetoclax-resistant cell lines (MINO-VR, MAVER-VR) and their paternal counterpart, in the promoter area of *BCL2*, *MCL1* and *BCL2L1* (coding for BCL-XL). Significant changes that potentially can lead to gene upregulation are marked in green, while changes that can lead to gene downregulation are marked in red.

| Illumina probe ID | UCSC_RefGene_Name | UCSC_RefGene_Group | $\Delta$ Acc. MINO-VR | $\Delta$ Meth. MINO-VR | $\Delta$ Acc. MAVER-VR | $\Delta$ Meth. MAVER-VR |
|-------------------|-------------------|--------------------|-----------------------|------------------------|------------------------|-------------------------|
|-------------------|-------------------|--------------------|-----------------------|------------------------|------------------------|-------------------------|

|            |      |       |        |        |        |        |
|------------|------|-------|--------|--------|--------|--------|
| cg05891614 | BCL2 | 3'UTR | -0,092 | 0,139  | -0,152 | 0,027  |
| cg21984711 | BCL2 | 3'UTR | -0,103 | 0,052  | 0,037  | -0,011 |
| cg17192381 | BCL2 | 3'UTR | -0,004 | -0,105 | 0,123  | -0,040 |
| cg20057935 | BCL2 | Body  | 0,003  | 0,025  | -0,028 | -0,012 |
| cg11655407 | BCL2 | Body  | -0,027 | 0,158  | 0,058  | 0,235  |
| cg22177062 | BCL2 | Body  | -0,020 | 0,575  | 0,139  | 0,107  |
| cg01282639 | BCL2 | Body  | -0,044 | 0,232  | 0,020  | -0,013 |
| cg27311011 | BCL2 | Body  | 0,006  | 0,040  | -0,031 | 0,005  |
| cg09898122 | BCL2 | Body  | -0,056 | 0,042  | -0,114 | -0,022 |
| cg06631916 | BCL2 | Body  | 0,005  | 0,070  | 0,008  | 0,017  |
| cg16156297 | BCL2 | Body  | -0,033 | 0,002  | -0,044 | -0,013 |
| cg02288628 | BCL2 | Body  | -0,090 | 0,016  | -0,001 | -0,039 |
| cg20593471 | BCL2 | Body  | -0,065 | -0,019 | -0,016 | -0,023 |
| cg08633051 | BCL2 | Body  | -0,076 | 0,179  | 0,082  | -0,106 |
| cg09698619 | BCL2 | Body  | 0,029  | -0,151 | 0,047  | 0,320  |
| cg19768034 | BCL2 | Body  | -0,026 | 0,190  | -0,013 | 0,226  |
| cg17079083 | BCL2 | Body  | -0,035 | 0,165  | 0,032  | 0,051  |
| cg12696761 | BCL2 | Body  | -0,061 | 0,109  | -0,014 | 0,120  |
| cg01100915 | BCL2 | Body  | -0,047 | 0,076  | -0,033 | 0,072  |
| cg12395867 | BCL2 | Body  | -0,062 | 0,164  | -0,029 | 0,136  |
| cg07788351 | BCL2 | Body  | -0,055 | 0,133  | -0,036 | 0,273  |

|            |      |      |        |        |        |        |
|------------|------|------|--------|--------|--------|--------|
| cg13042130 | BCL2 | Body | -0,068 | 0,180  | -0,034 | 0,256  |
| cg14833556 | BCL2 | Body | -0,021 | -0,101 | -0,014 | 0,083  |
| cg26856497 | BCL2 | Body | 0,054  | 0,010  | 0,031  | -0,075 |
| cg01108734 | BCL2 | Body | -0,007 | 0,048  | 0,065  | -0,026 |
| cg19875106 | BCL2 | Body | 0,008  | -0,028 | 0,011  | -0,051 |
| cg02402914 | BCL2 | Body | -0,113 | 0,085  | -0,037 | 0,281  |
| cg07571261 | BCL2 | Body | -0,001 | 0,128  | 0,019  | 0,004  |
| cg24168276 | BCL2 | Body | -0,131 | 0,232  | 0,008  | 0,165  |
| cg12526942 | BCL2 | Body | -0,020 | 0,054  | -0,091 | 0,045  |
| cg24124688 | BCL2 | Body | 0,014  | 0,025  | -0,053 | 0,033  |
| cg09330125 | BCL2 | Body | -0,066 | 0,115  | -0,031 | 0,160  |
| cg20221293 | BCL2 | Body | -0,014 | 0,181  | -0,022 | 0,005  |
| cg13580052 | BCL2 | Body | -0,072 | 0,076  | 0,053  | -0,006 |
| cg08223235 | BCL2 | Body | -0,025 | -0,262 | -0,016 | -0,045 |
| cg12459502 | BCL2 | Body | -0,004 | 0,105  | -0,012 | -0,069 |
| cg25059899 | BCL2 | Body | -0,073 | 0,049  | -0,003 | -0,013 |
| cg12310881 | BCL2 | Body | -0,004 | -0,001 | 0,047  | 0,132  |
| cg18683060 | BCL2 | Body | -0,098 | 0,154  | -0,018 | 0,324  |
| cg02907384 | BCL2 | Body | -0,070 | 0,290  | -0,159 | 0,341  |
| cg17574442 | BCL2 | Body | -0,024 | -0,049 | -0,052 | 0,028  |
| cg24763804 | BCL2 | Body | -0,026 | 0,325  | 0,036  | 0,336  |

|            |                     |                             |        |        |        |        |
|------------|---------------------|-----------------------------|--------|--------|--------|--------|
| cg20505444 | BCL2                | Body                        | -0,021 | 0,215  | -0,200 | 0,054  |
| cg10326130 | BCL2                | Body                        | 0,038  | 0,276  | 0,052  | 0,096  |
| cg15079347 | BCL2                | Body                        | -0,045 | 0,138  | -0,005 | 0,276  |
| cg04217152 | BCL2                | Body                        | -0,017 | 0,063  | 0,010  | -0,093 |
| cg15002683 | BCL2                | Body                        | -0,125 | 0,241  | -0,295 | 0,384  |
| cg26433266 | BCL2                | Body                        | -0,142 | 0,357  | -0,025 | 0,294  |
| cg25373630 | BCL2                | Body                        | -0,076 | 0,137  | -0,138 | 0,036  |
| cg14544831 | BCL2;BCL2           | Body;3'UTR                  | 0,014  | -0,004 | -0,024 | -0,010 |
| cg21602520 | BCL2;BCL2           | Body;Body                   | -0,082 | 0,004  | -0,126 | -0,028 |
| cg14889643 | BCL2;BCL2           | Body;Body                   | -0,050 | 0,029  | -0,060 | -0,009 |
| cg17602451 | BCL2;BCL2           | Body;Body                   | -0,048 | 0,011  | -0,063 | -0,020 |
| cg24740531 | BCL2;BCL2           | Body;Body                   | 0,072  | -0,062 | -0,032 | 0,013  |
| cg05858920 | BCL2;BCL2           | 5'UTR;5'UTR                 | -0,010 | 0,002  | -0,049 | -0,005 |
| cg01803238 | BCL2;BCL2           | 5'UTR;5'UTR                 | -0,006 | -0,016 | -0,039 | -0,029 |
| cg11330108 | BCL2;BCL2           | 5'UTR;5'UTR                 | 0,005  | -0,007 | -0,023 | -0,027 |
| cg27388618 | BCL2;BCL2;BCL2;BCL2 | 1stExon;5'UTR;1stExon;5'UTR | 0,003  | -0,012 | -0,018 | -0,019 |
| cg21777986 | BCL2;BCL2;BCL2;BCL2 | 1stExon;5'UTR;1stExon;5'UTR | 0,039  | -0,024 | -0,002 | -0,073 |
| cg09752703 | BCL2;BCL2           | TSS200;TSS200               | -0,010 | 0,003  | -0,066 | 0,015  |
| cg12461368 | BCL2;BCL2           | TSS200;TSS200               | -0,065 | 0,009  | -0,016 | -0,011 |
| cg03813215 | BCL2;BCL2           | TSS200;TSS200               | -0,012 | -0,012 | -0,018 | -0,016 |
| cg18423859 | BCL2;BCL2           | TSS200;TSS200               | -0,031 | -0,007 | -0,054 | 0,008  |



|                |           |                 |        |        |        |        |
|----------------|-----------|-----------------|--------|--------|--------|--------|
| cg05877<br>143 | BCL2;BCL2 | TSS200;TSS200   | -0,055 | -0,007 | -0,085 | 0,002  |
| cg14604<br>802 | BCL2;BCL2 | TSS200;TSS200   | -0,053 | 0,045  | -0,059 | 0,005  |
| cg05945<br>943 | BCL2;BCL2 | TSS200;TSS200   | -0,071 | 0,041  | 0,019  | -0,076 |
| cg16445<br>842 | BCL2;BCL2 | TSS1500;TSS1500 | -0,027 | 0,016  | -0,009 | -0,007 |
| cg17173<br>732 | BCL2;BCL2 | TSS1500;TSS1500 | -0,046 | 0,022  | -0,007 | -0,005 |
| cg08554<br>462 | BCL2;BCL2 | TSS1500;TSS1500 | -0,055 | 0,012  | -0,065 | 0,006  |
| cg23699<br>933 | BCL2;BCL2 | TSS1500;TSS1500 | -0,039 | -0,014 | -0,050 | -0,018 |
| cg25730<br>573 | BCL2;BCL2 | TSS1500;TSS1500 | 0,023  | -0,006 | 0,023  | -0,008 |
| cg14455<br>307 | BCL2;BCL2 | TSS1500;TSS1500 | -0,064 | 0,020  | -0,087 | 0,018  |
| cg06881<br>186 | BCL2;BCL2 | TSS1500;TSS1500 | -0,023 | -0,019 | -0,019 | -0,001 |
| cg16003<br>390 | BCL2;BCL2 | TSS1500;TSS1500 | 0,019  | -0,010 | 0,017  | -0,001 |
| cg11255<br>230 | BCL2;BCL2 | TSS1500;TSS1500 | 0,064  | -0,056 | 0,000  | -0,037 |
| cg20777<br>956 | BCL2;BCL2 | TSS1500;TSS1500 | -0,037 | 0,043  | -0,076 | 0,029  |
| cg22152<br>050 | BCL2;BCL2 | TSS1500;TSS1500 | -0,038 | 0,063  | -0,055 | 0,008  |
| cg12953<br>669 | BCL2;BCL2 | TSS1500;TSS1500 | 0,001  | -0,018 | -0,088 | 0,049  |
| cg05724<br>997 | BCL2;BCL2 | TSS1500;TSS1500 | -0,005 | -0,039 | -0,102 | 0,042  |
| cg12090<br>740 | BCL2;BCL2 | TSS1500;TSS1500 | 0,019  | -0,036 | -0,107 | 0,031  |
| cg26277<br>730 | BCL2;BCL2 | TSS1500;TSS1500 | -0,059 | 0,024  | -0,080 | 0,019  |
| cg21793<br>948 | BCL2;BCL2 | TSS1500;TSS1500 | -0,091 | 0,054  | -0,117 | 0,059  |
| cg23707<br>289 | BCL2;BCL2 | TSS1500;TSS1500 | -0,052 | 0,015  | -0,068 | 0,009  |
| cg26118<br>326 | MCL1;MCL1 | 3'UTR;3'UTR     | -0,053 | 0,133  | 0,041  | 0,012  |

|            |                               |                                           |        |        |        |        |
|------------|-------------------------------|-------------------------------------------|--------|--------|--------|--------|
| cg24998145 | MCL1;MCL1                     | Body;Body                                 | 0,008  | -0,035 | -0,021 | -0,049 |
| cg06832064 | MCL1;MCL1                     | Body;Body                                 | -0,008 | -0,012 | -0,033 | -0,027 |
| cg00374009 | MCL1;MCL1;MCL1;MCL1           | Body;ExonBnd;1stExon;1stExon              | -0,001 | -0,009 | -0,046 | 0,016  |
| cg27166593 | MCL1;MCL1;MCL1;MCL1           | Body;ExonBnd;1stExon;1stExon              | 0,032  | -0,025 | -0,014 | -0,011 |
| cg10858523 | MCL1;MCL1                     | 1stExon;1stExon                           | 0,001  | -0,020 | -0,004 | -0,012 |
| cg18397157 | MCL1;MCL1                     | 1stExon;1stExon                           | 0,028  | -0,030 | 0,030  | -0,022 |
| cg04228104 | MCL1;MCL1                     | 1stExon;1stExon                           | 0,031  | -0,039 | 0,153  | -0,165 |
| cg07561848 | MCL1;MCL1                     | 1stExon;1stExon                           | 0,091  | -0,084 | 0,062  | -0,061 |
| cg09804220 | MCL1;MCL1                     | 1stExon;1stExon                           | 0,059  | -0,047 | 0,014  | -0,024 |
| cg09726469 | MCL1;MCL1;MCL1;MCL1           | 1stExon;1stExon;5'UTR;5'UTR               | 0,031  | -0,035 | -0,001 | -0,035 |
| cg17217603 | MCL1;MCL1;MCL1;MCL1           | 1stExon;1stExon;5'UTR;5'UTR               | 0,048  | -0,054 | 0,077  | -0,088 |
| cg16431914 | MCL1;MCL1;MCL1;MCL1           | 1stExon;1stExon;5'UTR;5'UTR               | -0,014 | -0,014 | -0,099 | 0,013  |
| cg05431687 | MCL1;MCL1;MCL1;MCL1;MCL1;MCL1 | 1stExon;1stExon;1stExon;5'UTR;5'UTR;5'UTR | -0,122 | -0,010 | -0,146 | -0,036 |
| cg24285922 | MCL1;MCL1;MCL1;MCL1;MCL1;MCL1 | 1stExon;1stExon;1stExon;5'UTR;5'UTR;5'UTR | -0,021 | -0,029 | -0,132 | -0,011 |
| cg06217312 | MCL1;MCL1                     | TSS1500;TSS1500                           | 0,024  | -0,025 | 0,017  | -0,048 |
| cg22649068 | MCL1;MCL1                     | TSS1500;TSS1500                           | 0,000  | -0,031 | -0,064 | -0,041 |
| cg13175981 | MCL1;MCL1                     | TSS1500;TSS1500                           | 0,004  | -0,031 | -0,063 | -0,005 |
| cg25183744 | MCL1;MCL1;MCL1                | TSS200;TSS200;TSS200                      | 0,024  | -0,025 | -0,039 | -0,030 |
| cg27483771 | MCL1;MCL1;MCL1                | TSS1500;TSS1500;TSS1500                   | -0,002 | -0,015 | -0,018 | -0,033 |
| cg02961109 | MCL1;MCL1                     | TSS1500;TSS1500                           | 0,002  | 0,057  | -0,064 | 0,113  |
| cg18016565 | MCL1;MCL1                     | TSS1500;TSS1500                           | -0,060 | 0,107  | -0,018 | 0,055  |

|                |               |             |        |        |        |        |
|----------------|---------------|-------------|--------|--------|--------|--------|
| cg25291<br>404 | BCL2L1;BCL2L1 | 3'UTR;3'UTR | 0,013  | -0,124 | -0,009 | 0,239  |
| cg08466<br>983 | BCL2L1;BCL2L1 | Body;Body   | 0,004  | -0,06  | 0,077  | -0,057 |
| cg21948<br>170 | BCL2L1;BCL2L1 | Body;Body   | 0,026  | -0,036 | -0,089 | -0,072 |
| cg15488<br>794 | BCL2L1;BCL2L1 | Body;Body   | 0,015  | 0,138  | -0,271 | 0,422  |
| cg07804<br>698 | BCL2L1;BCL2L1 | Body;Body   | 0,064  | -0,02  | -0,083 | -0,027 |
| cg00013<br>684 | BCL2L1;BCL2L1 | Body;Body   | -0,016 | 0,001  | -0,296 | -0,017 |
| cg01947<br>399 | BCL2L1;BCL2L1 | Body;Body   | -0,031 | 0,007  | -0,003 | -0,157 |
| cg06892<br>281 | BCL2L1;BCL2L1 | Body;Body   | -0,051 | 0,171  | -0,131 | 0,411  |
| cg02538<br>009 | BCL2L1;BCL2L1 | Body;Body   | -0,009 | -0,069 | 0,002  | 0,245  |
| cg14518<br>385 | BCL2L1;BCL2L1 | Body;Body   | -0,023 | 0,02   | -0,125 | -0,102 |
| cg14517<br>873 | BCL2L1;BCL2L1 | Body;Body   | -0,052 | 0,256  | 0,007  | -0,042 |
| cg17168<br>956 | BCL2L1;BCL2L1 | Body;Body   | -0,04  | 0,045  | -0,057 | 0,134  |
| cg11370<br>496 | BCL2L1;BCL2L1 | Body;Body   | 0,067  | -0,364 | -0,019 | 0,144  |
| cg04897<br>370 | BCL2L1;BCL2L1 | Body;Body   | -0,007 | 0,108  | -0,025 | 0,361  |
| cg21276<br>232 | BCL2L1;BCL2L1 | Body;Body   | 0,021  | 0,047  | -0,039 | 0,022  |
| cg11265<br>696 | BCL2L1;BCL2L1 | Body;Body   | -0,016 | 0,005  | -0,016 | -0,032 |
| cg04368<br>572 | BCL2L1;BCL2L1 | Body;Body   | -0,063 | 0,292  | 0,058  | 0,21   |
| cg00300<br>298 | BCL2L1;BCL2L1 | Body;Body   | -0,054 | 0,118  | -0,032 | 0,094  |
| cg18787<br>420 | BCL2L1;BCL2L1 | Body;Body   | -0,029 | 0,042  | -0,059 | 0,009  |
| cg12873<br>919 | BCL2L1;BCL2L1 | Body;Body   | -0,029 | 0,094  | 0,038  | -0,429 |
| cg13989<br>999 | BCL2L1;BCL2L1 | Body;Body   | -0,043 | 0,13   | 0,037  | -0,088 |

|            |                                    |                                  |        |        |        |        |
|------------|------------------------------------|----------------------------------|--------|--------|--------|--------|
| cg16137862 | BCL2L1;BCL2L1                      | 5'UTR;5'UTR                      | -0,133 | 0,213  | 0,121  | -0,296 |
| cg07602173 | BCL2L1;BCL2L1;ABALON;BCL2L1;BCL2L1 | 1stExon;1stExon;Body;5'UTR;5'UTR | -0,089 | 0,039  | -0,066 | -0,042 |
| cg21306641 | BCL2L1;BCL2L1;ABALON;BCL2L1;BCL2L1 | 1stExon;1stExon;Body;5'UTR;5'UTR | -0,003 | -0,029 | 0,03   | -0,048 |
| cg23509889 | BCL2L1;BCL2L1;BCL2L1;BCL2L1        | 5'UTR;1stExon;5'UTR;1stExon      | -0,028 | -0,016 | -0,013 | -0,018 |
| cg15025647 | BCL2L1;BCL2L1;BCL2L1;BCL2L1        | 5'UTR;1stExon;5'UTR;1stExon      | 0,015  | -0,026 | -0,052 | -0,026 |
| cg11659435 | BCL2L1;BCL2L1                      | TSS200;TSS200                    | -0,011 | -0,008 | 0,043  | -0,055 |
| cg02457826 | BCL2L1;BCL2L1                      | TSS200;TSS200                    | 0,061  | -0,066 | 0,077  | -0,116 |
| cg07379251 | BCL2L1;BCL2L1                      | TSS200;TSS200                    | -0,103 | 0,075  | -0,022 | -0,033 |
| cg00782854 | BCL2L1;BCL2L1                      | TSS1500;TSS1500                  | -0,042 | 0      | -0,084 | 0,003  |
| cg12896779 | BCL2L1;BCL2L1;ABALON               | TSS1500;TSS1500;Body             | -0,015 | -0,01  | -0,095 | -0,007 |
| cg11551419 | BCL2L1;BCL2L1                      | TSS1500;TSS1500                  | -0,009 | -0,006 | -0,04  | -0,012 |
| cg08619561 | BCL2L1;BCL2L1                      | TSS1500;TSS1500                  | -0,006 | -0,039 | -0,02  | -0,016 |
| cg11809604 | BCL2L1;BCL2L1                      | TSS1500;TSS1500                  | 0,019  | -0,024 | 0,001  | -0,031 |
| cg23752198 | BCL2L1;BCL2L1                      | TSS1500;TSS1500                  | -0,003 | -0,001 | 0,047  | -0,062 |
| cg00058652 | ABALON;BCL2L1;BCL2L1               | TSS1500;Body;Body                | 0,05   | -0,025 | -0,122 | -0,063 |
| cg09190106 | ABALON;BCL2L1;BCL2L1               | Body;5'UTR;5'UTR                 | 0,036  | -0,034 | 0,011  | -0,04  |

**Table S5.**

Overview of the name, drug class and mechanism of action of all 13 compounds used in the drug-screen experiments.

| <b>Compound</b>          | <b>Drug class</b>           | <b>Specific mechanism of action</b>                |
|--------------------------|-----------------------------|----------------------------------------------------|
| Vorinostat               |                             | HDAC inhibitor                                     |
| Tazemetostat (EPZ-6438)  |                             | EZH2 inhibitor                                     |
| Valemetostat (DS-3201b)  | Epigenetic drugs            | EZH1/EZH2 inhibitor                                |
| Metformin                | Metabolic modifier          | AMPK activator                                     |
| Selinexor (KPT-330)      | Nuclear transport inhibitor | XPO1 inhibitor                                     |
| Copanlisib (BAY 80-6946) |                             | pan-class I PI3K inhibitor                         |
| Everolimus               |                             | mTOR1 inhibitor                                    |
| Sapanisertib (TAK-228)   |                             | mTOR1/mTOR2 inhibitor                              |
| Gedatolisib (PKI-587)    |                             | PI3K $\alpha$ , PI3K $\gamma$ , and mTOR inhibitor |
| TIC10 (ONC-201)          |                             | Akt and ERK inhibitor                              |
| Capivasertib (AZD5363)   |                             | Akt inhibitor                                      |
| Idelalisib (CAL-101)     | PI3K/Akt/mTOR inhibitors    | p110 $\delta$ inhibitor                            |
| IQ3                      | Interleukin inhibitor       | c-Jun N-terminal kinase (JNK) inhibitor            |
